# Supplementary material
Source: PubMed Central journal article supplement (PMC1955743)
Supplement: hesr0042-0084-s1.pdf [file hesr0042-0084-s1.pdf]

**APPENDIX A: INTERVIEW GUIDE**

| CONCEPT<br>TAPPED             | PRIMARY QUESTION                                                                                                                                                     | POSSIBLE PROBES                                                                                                                                                                                                                                                                                                                                                                                                                                                                                                                                                                                                                                                                                                                                                                                                                                           |
|-------------------------------|----------------------------------------------------------------------------------------------------------------------------------------------------------------------|-----------------------------------------------------------------------------------------------------------------------------------------------------------------------------------------------------------------------------------------------------------------------------------------------------------------------------------------------------------------------------------------------------------------------------------------------------------------------------------------------------------------------------------------------------------------------------------------------------------------------------------------------------------------------------------------------------------------------------------------------------------------------------------------------------------------------------------------------------------|
| Quality of Care<br>in General | 1. How do you or your staff identify quality of care issues in need of improvement for your <b>OUTPATIENT</b> primary care clinics?                                  | <p><i>Probe for explicit processes (e.g., strategic planning, balanced score cards, data that is monitored, etc.)</i></p> <p>a. Who would be responsible for initiating and carrying out such efforts?</p> <p>b. Who would be responsible for monitoring such efforts?</p>                                                                                                                                                                                                                                                                                                                                                                                                                                                                                                                                                                                |
| Mental Models                 | <p>2. What does the term “Clinical Practice Guidelines” mean to you?</p> <p>3. How do guidelines help you improve the quality of care you provide your patients?</p> | <p>a. What role do you see for clinical practice guideline use as a method for improving quality of care?</p> <p>b. Do you believe clinical practice guidelines are effective for improving quality of care? Please explain.</p> <p style="padding-left: 40px;">➤ If no, follow up with, “Despite your beliefs what is your experience?”</p> <p>a. As a source of data feedback?</p> <p>b. How is data collected and utilized in your facility to improve the quality of patient care (e.g., administrative “scorekeeping” or as feedback for improving the quality of care)?</p> <p>c. Was EPRP data or other data on performance distributed?</p> <p>d. Did EPRP results affect individual performance evaluations?</p> <p>e. Does the facility collect clinical outcome data (mortality, readmission, functional status) related to the guideline?</p> |

| CONCEPT<br>TAPPED                         | PRIMARY QUESTION                                                                                                                                                                                          | POSSIBLE PROBES                                                                                                                                                                                          |
|-------------------------------------------|-----------------------------------------------------------------------------------------------------------------------------------------------------------------------------------------------------------|----------------------------------------------------------------------------------------------------------------------------------------------------------------------------------------------------------|
| <b>CPG Success<br/>Story</b>              | 4. Could you tell us the story of a time you and your team successfully implemented a clinical practice guideline (e.g., smoking cessation, depression screening, Diabetes mellitus, hypertension, etc.)? | <i>Probe for the Who, What, When, Where, &amp; How of the story.</i>                                                                                                                                     |
|                                           |                                                                                                                                                                                                           | a. What were the steps?                                                                                                                                                                                  |
|                                           |                                                                                                                                                                                                           | b. Who was involved? To what extent are clinicians involved in determining how to implement guidelines?                                                                                                  |
|                                           |                                                                                                                                                                                                           | c. How was this guideline effort brought to the attention of clinicians and managers in your facility? (e.g., formal meetings, guideline champions, grand rounds, e-mail distributions, web sites, etc)? |
|                                           |                                                                                                                                                                                                           | d. To what extent were committees (one steering committee for all guidelines or guideline specific committees) used to implement guidelines?                                                             |
| <b>CPG Training &amp;<br/>Development</b> | 5. Please describe the training (i.e., professional development) that clinicians have received for implementing guidelines.                                                                               | a. Would clinicians say they have been provided adequate support for professional development with respect to CPG implementation?                                                                        |
|                                           |                                                                                                                                                                                                           | b. Any training in the use of technology (e.g., CPRS, clinical reminders, etc.)?                                                                                                                         |
|                                           |                                                                                                                                                                                                           | c. CME credit?                                                                                                                                                                                           |
| CONCEPT                                   | PRIMARY QUESTION                                                                                                                                                                                          | POSSIBLE PROBES                                                                                                                                                                                          |

| TAPPED                     |                                                                                         |                                                                                                              |
|----------------------------|-----------------------------------------------------------------------------------------|--------------------------------------------------------------------------------------------------------------|
| <p><b>Facilitators</b></p> | <p>6. What are the most important factors that facilitate guideline implementation?</p> | <p>a. Technology (CPRS, clinical reminders)?</p>                                                             |
|                            |                                                                                         | <p>b. Targeted educational or training programs, patient specific reminder systems, workshops, retreats?</p> |
|                            |                                                                                         | <p>c. Incentives (e.g., monetary, extra time off from work, gift certificates, etc.)?</p>                    |
|                            |                                                                                         | <p>d. Mentoring or coaching?</p>                                                                             |
|                            |                                                                                         | <p>e. Additional resources (e.g., equipment, staff, etc.)?</p>                                               |
|                            |                                                                                         | <p>f. Social Factors such as teamwork or networks?</p>                                                       |
|                            |                                                                                         | <p>g. Representation from a diversity of service lines?</p>                                                  |
|                            |                                                                                         | <p>h. Presence of a guideline champion?</p>                                                                  |
|                            |                                                                                         | <p>i. Supportive leadership (i.e., VISN and/or facility)?</p>                                                |
|                            |                                                                                         | <p>j. Pocket cards or “lite” versions of the guidelines?</p>                                                 |
| <p><b>Barriers</b></p>     | <p>7. What are the most important factors that hinder guideline implementation?</p>     | <p>a. Lack of resources, or staff?</p>                                                                       |
|                            |                                                                                         | <p>b. Time (i.e., patient interactions are targeted for 20 minutes)?</p>                                     |
|                            |                                                                                         | <p>c. Lack of training?</p>                                                                                  |
|                            |                                                                                         | <p>d. Not enough support?</p>                                                                                |
|                            |                                                                                         | <p>e. Financial?</p>                                                                                         |

| CONCEPT<br>TAPPED                                                   | PRIMARY QUESTION                                                                                              | POSSIBLE PROBES                                                                                                                                                                                                                                              |
|---------------------------------------------------------------------|---------------------------------------------------------------------------------------------------------------|--------------------------------------------------------------------------------------------------------------------------------------------------------------------------------------------------------------------------------------------------------------|
| <b>Innovations</b>                                                  | 8. Were there any changes or redesigns in the clinical practices or equipment that supported the use of CPGs. | a. How were forms/procedures or reports changed to support adherence to guidelines?<br>b. How were the responsibilities of nurses, aides, other personnel changed to support adherence?<br>c. How were resources allocated/reallocated to support adherence? |
| <b>Structural,<br/>logistic, and<br/>organizational<br/>factors</b> | 9. Please describe any other conditions that may influence CPG implementation?                                | a. Size of the facility?<br>b. Academic affiliation?<br>c. Competition with other QI initiatives?<br>d. Location (e.g., remote vs. main facility)?                                                                                                           |
